# Supplementary material
Source: PubMed Central journal article supplement (PMC9512549)

Supplemental Figures for  
Kiran T, Green ME, Wu FC, et al. Family physicians in Ontario, Canada stopping practice during  
COVID-19 pandemic. *Ann Fam Med.* 2022;20(5):460-463.

**Supplemental Figure 1. Primary care visits December 31, 2019 to September 29, 2020 compared to the same period in 2019 stratified by type of visit (office, virtual, home)**

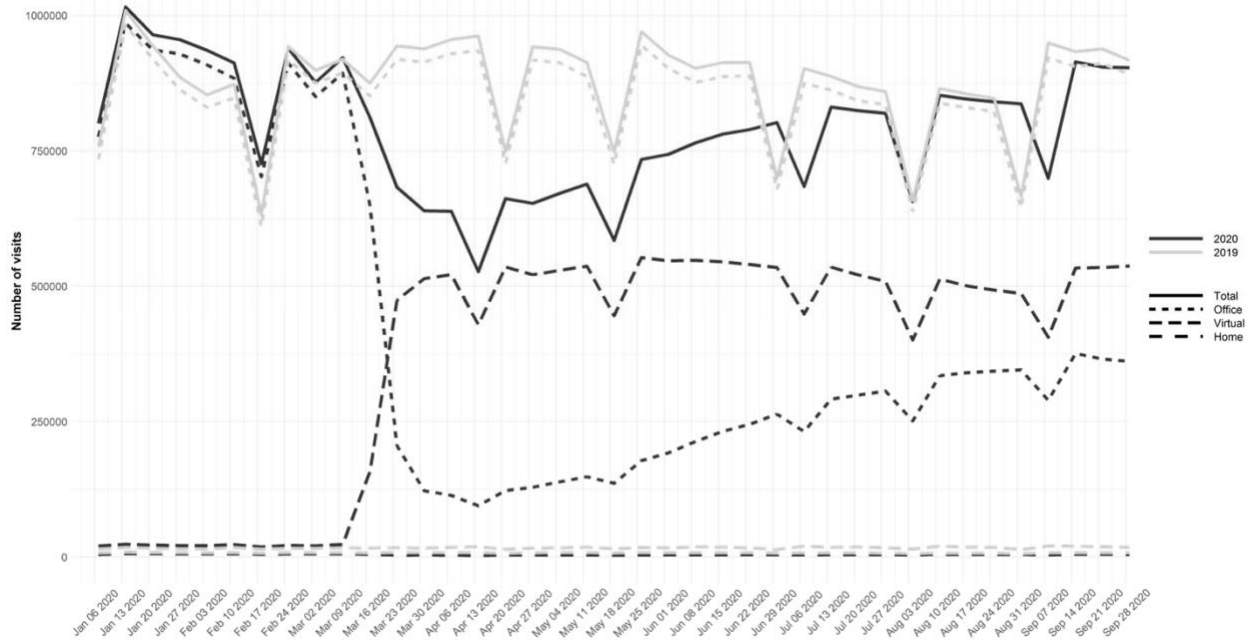

**Supplemental Figure 2. Histogram of the number of physicians by the ratio of total visits during the first six months of the COVID-19 pandemic (March to September 2020) to total visits during the same time period in 2019.**

---

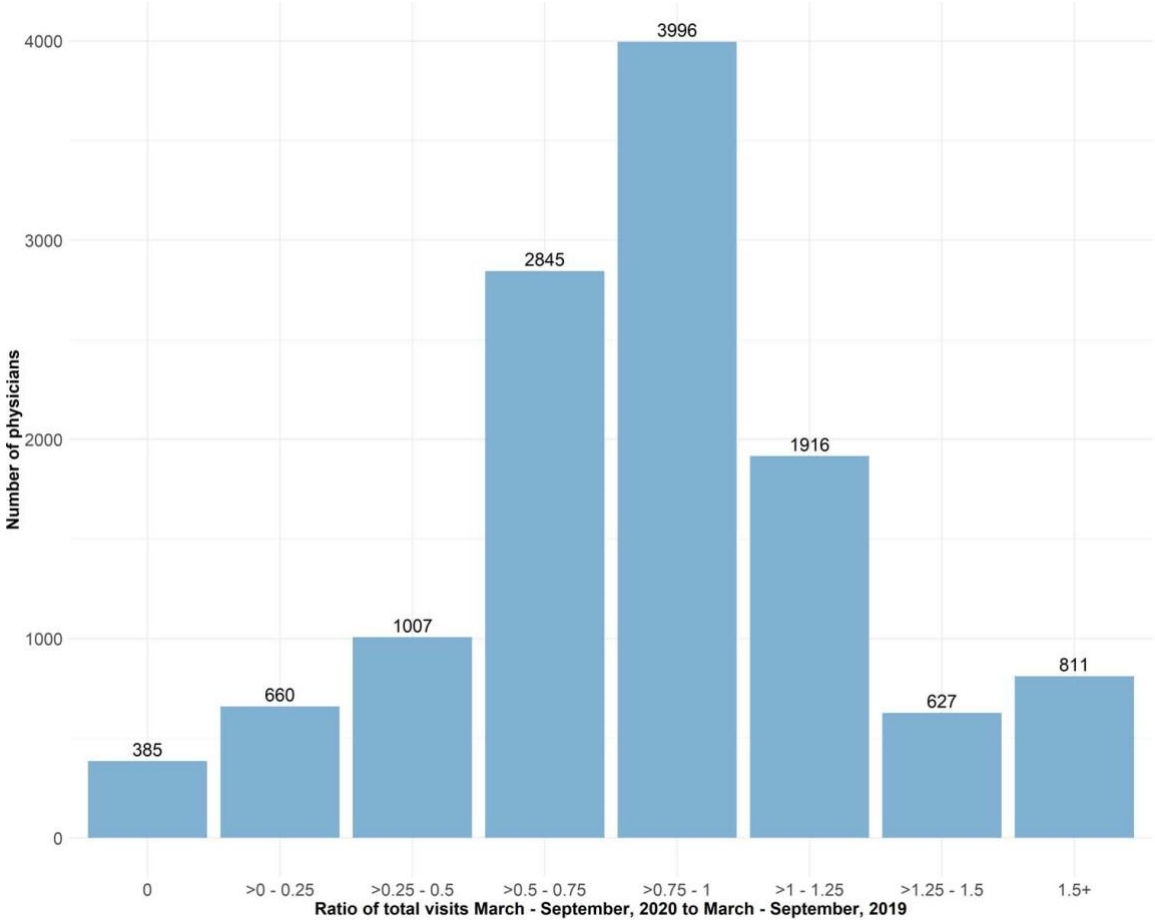

### Supplemental Figure 3. Variation within and between patient enrolment models in the ratio of total visits during the first six months of the COVID- 19 pandemic (March to September 2020) to total visits during the same time period in 2019.

Note: The black line represents the mean ratio for the practice group. Each group can have 3 or more physicians. Each dot represents a physician. Physicians within the same practice group are represented on the same vertical line. We calculated an intraclass correlation coefficient from a three-level, intercept-only mixed linear model to understand how much of the total variance in the ratio of visits during the pandemic to the same period in 2019 was attributable to physician group and practice type. We found the variation was not explained by model of care (ICC: 1.5%) or the specific practice group the physician belonged to (ICC: 4.6%)

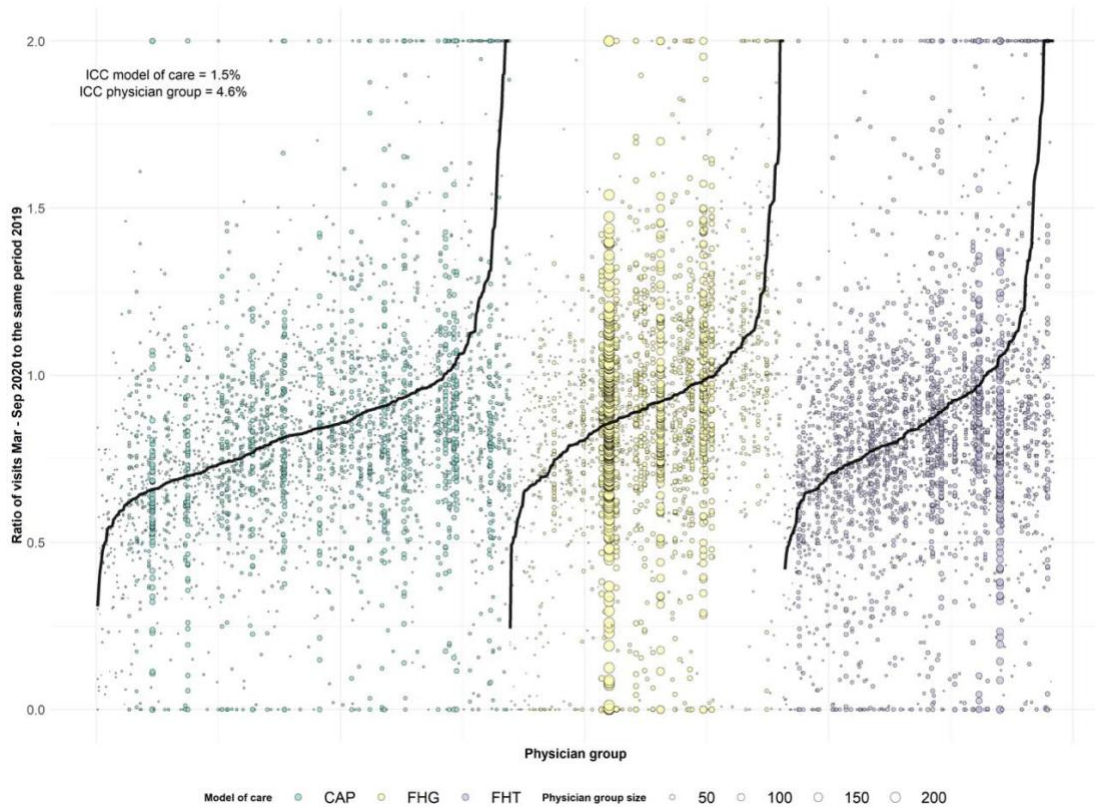

**Supplemental Figure 4. Percentage of all family physician within a sub-region who had no patient visits between March 11, 2020 and September 29, 2020**

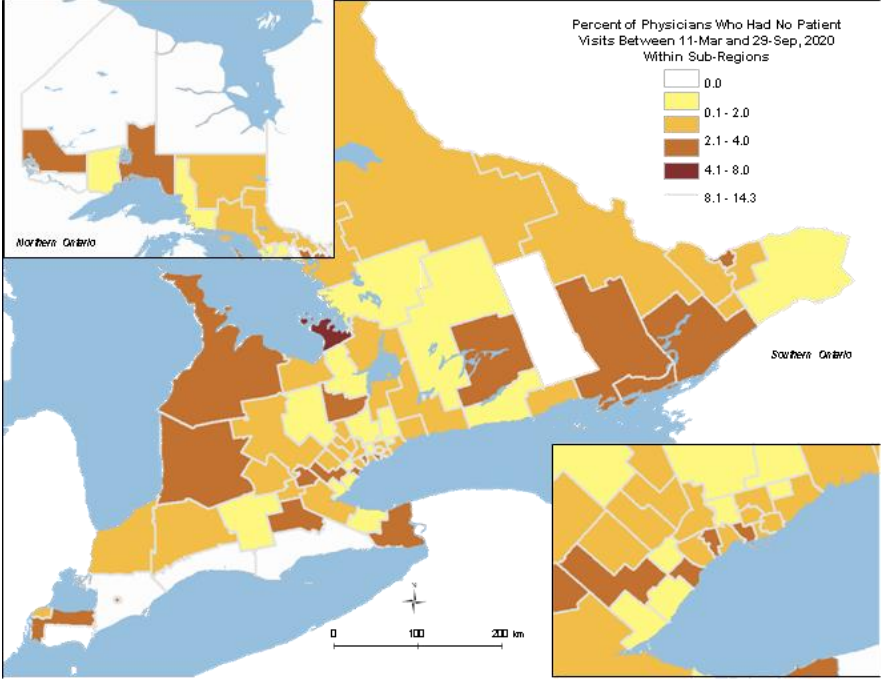

**Supplemental Figure 5. Percentage of family physicians who were actively practicing from January to March but who had zero primary care visits between April and September in the given year, 2010-2020**

---

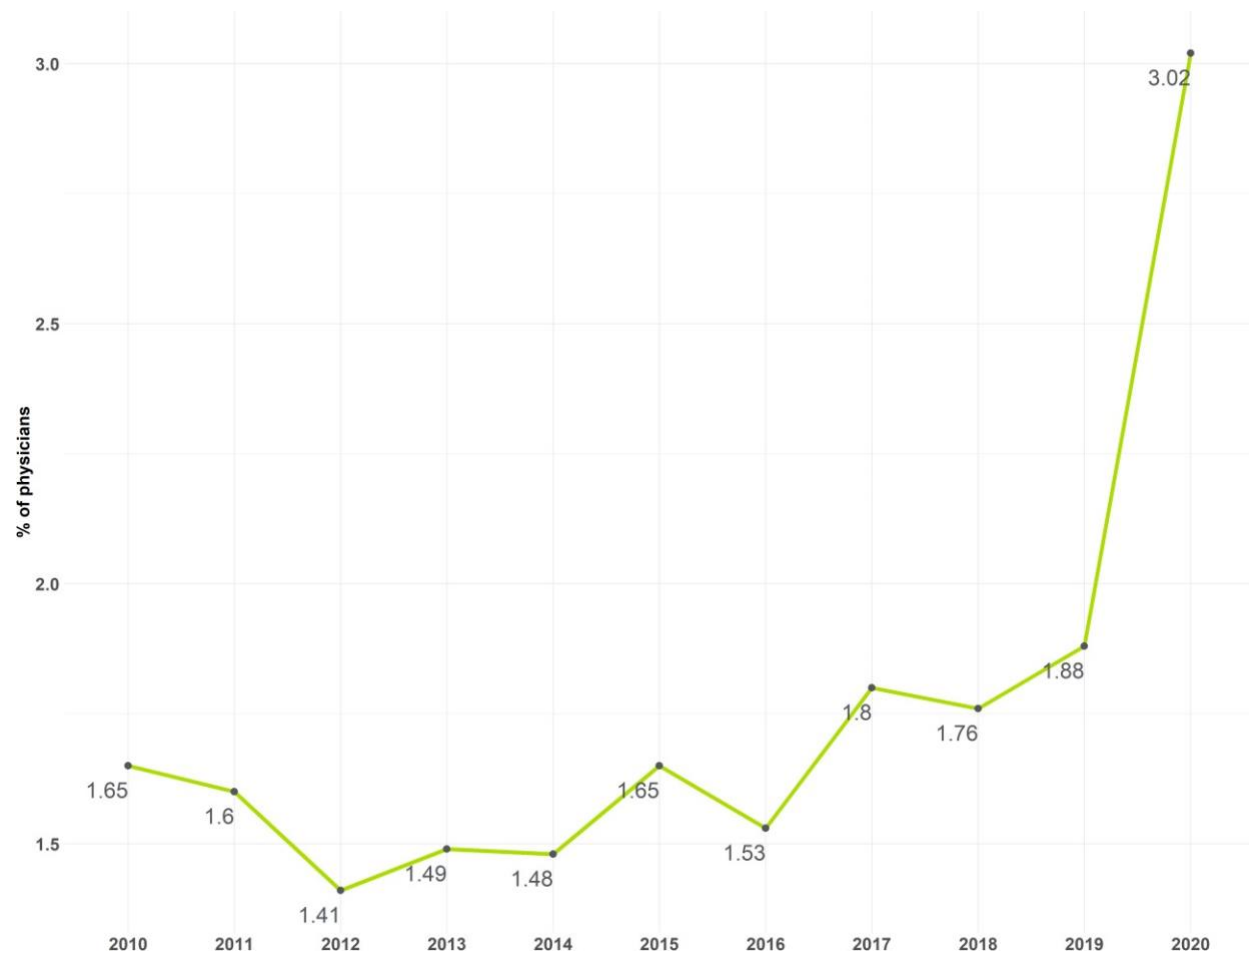

Supplement: Kiran_Supp.pdf [file Kiran_Supp.pdf]
